# Supplementary material for: Psychometric Properties and Validation of the Arabic Academic Performance Rating Scale
Source: Hindawi journal article supplement (doi:10.1155/2017/1504701), 2017-01-01
Supplement: f1 [file 1504701.f1.docx]

**APPENDIX - A**

**ACADEMIC PERFORMANCE RATING SCALE (APRS)**

**For each of the following items, please estimate the above student's performance over the PAST WEEK.**

**For each item please circle one choice only.**

1. Estimate the percentage of written math work completed (regardless of accuracy) relative to other classmates

| 0-49% | 50-69% | 70-79% | 80-89% | 90-100% |
| --- | --- | --- | --- | --- |
| 1 | 2 | 3 | 4 | 5 |

2. Estimate the percentage of written language arts work completed (regardless of accuracy) relative to other classmates

| 0-49% | 50-69% | 70-79% | 80-89% | 90-100% |
| --- | --- | --- | --- | --- |
| 1 | 2 | 3 | 4 | 5 |

3. Estimate the accuracy of completed math work (i.e., percentage of correct work done)

| 0-64% | 65-69% | 70-79% | 80-89% | 90-100% |
| --- | --- | --- | --- | --- |
| 1 | 2 | 3 | 4 | 5 |

4. Estimate the accuracy of completed language arts work (i.e., percentage of correct work done)

| 0-64% | 65-69% | 70-79% | 80-89% | 90-100% |
| --- | --- | --- | --- | --- |
| 1 | 2 | 3 | 4 | 5 |

5. How consistent has the quality of this child's academic work been over the past week?

| Consistently poor | More poor than successful | Variable | More successful than poor | Consistently successful |
| --- | --- | --- | --- | --- |
| 1 | 2 | 3 | 4 | 5 |

6. How frequently does this student follow the teachers instructions when in a large group?

| Never | Rarely | Sometimes | Often | Very Often |
| --- | --- | --- | --- | --- |
| 1 | 2 | 3 | 4 | 5 |

7. How frequently does this student follow the teachers instructions when in a small group?

| Never | Rarely | Sometimes | Often | Very Often |
| --- | --- | --- | --- | --- |
| 1 | 2 | 3 | 4 | 5 |

8. How quickly does the child pick up novel concepts?

| Never | Rarely | Sometimes | Often | Very Often |
| --- | --- | --- | --- | --- |
| 1 | 2 | 3 | 4 | 5 |

9. What is the quality or neatness of this child's handwriting?

| Poor | Fair | Average | Above average | Excellent |
| --- | --- | --- | --- | --- |
| 1 | 2 | 3 | 4 | 5 |

10. What is the quality or neatness of this child's reading skills?

| Poor | Fair | Average | Above average | Excellent |
| --- | --- | --- | --- | --- |
| 1 | 2 | 3 | 4 | 5 |

11. What is the quality or neatness of this child's speaking skills?

| Poor | Fair | Average | Above average | Excellent |
| --- | --- | --- | --- | --- |
| 1 | 2 | 3 | 4 | 5 |

12. How often does the child complete written work in a hasty fashion?

| Never | Rarely | Sometimes | Often | Very Often |
| --- | --- | --- | --- | --- |
| 1 | 2 | 3 | 4 | 5 |

13. How often does the child take more time to complete work than his/her classmates?

| Never | Rarely | Sometimes | Often | Very Often |
| --- | --- | --- | --- | --- |
| 1 | 2 | 3 | 4 | 5 |

14. How often does the child able to pay attention without you prompting?

| Never | Rarely | Sometimes | Often | Very Often |
| --- | --- | --- | --- | --- |
| 1 | 2 | 3 | 4 | 5 |

15. How frequently does the child require assistance to accurately complete his/her academic work?

| Never | Rarely | Sometimes | Often | Very Often |
| --- | --- | --- | --- | --- |
| 1 | 2 | 3 | 4 | 5 |

16. How often does the child begin the work prior to understanding?

| Never | Rarely | Sometimes | Often | Very Often |
| --- | --- | --- | --- | --- |
| 1 | 2 | 3 | 4 | 5 |

17. How often does the child have difficulty in recalling material from the previous day's lessons?

| Never | Rarely | Sometimes | Often | Very Often |
| --- | --- | --- | --- | --- |
| 1 | 2 | 3 | 4 | 5 |

18. How often does the child appear to be staring excessively or "spaced out"?

| Never | Rarely | Sometimes | Often | Very Often |
| --- | --- | --- | --- | --- |
| 1 | 2 | 3 | 4 | 5 |

19. How often does the child tend to lack emotional response in a social situation?

| Never | Rarely | Sometimes | Often | Very Often |
| --- | --- | --- | --- | --- |
| 1 | 2 | 3 | 4 | 5 |

**APPENDIX - B**

**Arabic - Academic Performance Rating Scale - 15 (A-APRS-15)**

مقياس معدل الأداء الأكاديمى

الطالب ------------------------- التاريخ ------------------------------------------

السن --------------------------- الدرجة -------------- المدرس -----------------------

لكل من البنود المبينة أدناه ، فضلا قيم أداء الطالب خلال الأسبوع الماضى لكل بند . ضع دائرة على اختيار واحد فقط.

| **البند** | **التقييم** | | | | |
| --- | --- | --- | --- | --- | --- |
| 1. قيّم نسبة أعمال الرياضيات المكتوبة والمكتملة (بغض النظر عن دقتها) بالنسبة لباقى الزملاء فى الفصل | 0-49%  1 | 50-69%  2 | 70-79%  3 | 80-89%  4 | 90-100%  5 |
| 1. قيم نسبة أعمال اللغة الأدبية المكتوبة والمكتملة (بغض النظر عن دقتها) بالنسبة لباقى الزملاء فى الفصل | 0-49%  1 | 50-69%  2 | 70-79%  3 | 80-89%  4 | 90-100%  5 |
| 1. قيم دقة أعمال الرياضيات المكتوبة ( نسبة الصحيح من العمل المنفذ)) | 0-49%  1 | 50-69%  2 | 70-79%  3 | 80-89%  4 | 90-100%  5 |
| 1. قيم دقة أعمال اللغة الأدبية المكتوبة ( نسبة الصحيح من العمل المنفذ) | 0-49%  1 | 50-69%  2 | 70-79%  3 | 80-89%  4 | 90-100%  5 |
| 1. ما مدى ثبات جودة الأداء الأكاديمى لهذا الطفل خلال الأسبوع الماضى ؟ | دائما ضعيفة  1 | أضعف من ناجحة  2 | متغيرة  3 | ناجحة أكثر من ضعيفة  4 | دائما ناجحة  5 |
| 1. كم مرة يتابع الطفل بدقة تعليمات المدرس أو تعليمات مناقشات الفصل فى التجمعات الكبيرة (كل الفصل مثلا) | مطلقا  1 | نادرا  2 | أحيانا  3 | غالبا  4 | دائما  5 |
| 1. كم مرة يتابع الطفل بدقة تعليمات المدرس أو تعليمات مناقشات الفصل فى التجمعات الصغيرة (مجموعة القراءة مثلا) ؟ | مطلقا  1 | نادرا  2 | أحيانا  3 | غالبا  4 | دائما  5 |
| 1. مامدى سرعة تعلم الطفل لمادة جديدة ( التقاط مفاهيم قصة مثلا) ؟ | بطئ جدا  1 | بطئ  2 | متوسط  3 | سريع  4 | سريع جدا  5 |
| 1. ماهى درجة تناسق خط يد الطفل فى الكتابة ؟ | ضعيف  1 | مقبول  2 | متوسط  3 | فوق المتوسط  4 | ممتاز  5 |
| 1. مامدى جودة مهارات القراءة لهذا الطفل ؟ | ضعيف  1 | مقبول  2 | متوسط  3 | فوق المتوسط  4 | ممتاز  5 |
| 1. مامدى جودة مهارات التحدث لهذا الطفل ؟ | ضعيف  1 | مقبول  2 | متوسط  3 | فوق المتوسط  4 | ممتاز  5 |
| 1. كم مرة يكمل الطفل أعماله الكتابية بشكل مهمل و متسرع ؟ | مطلقا  1 | نادرا  2 | أحيانا  3 | غالبا  4 | دائما  5 |
| 1. كم مرة يكون الطفل قادرا على الانتباه دون لفت نظره / نظرها ؟ | مطلقا  1 | نادرا  2 | أحيانا  3 | غالبا  4 | دائما  5 |
| 1. كم مرة يتم الطفل عمله الكتابى قبل فهم الارشادات ؟ | مطلقا  1 | نادرا  2 | أحيانا  3 | غالبا  4 | دائما  5 |
| 1. كم مرة يجد الطفل صعوبة فى تذكر المواد من دروس اليوم السابق ؟ | مطلقا  1 | نادرا  2 | أحيانا  3 | غالبا  4 | دائما  5 |
